# Supplementary material
Source: MDPI journal article supplement (https://www.mdpi.com/2073-4352/13/5/793)
Supplement: s1 [file s1]

## SUPPLEMENTARY MATERIAL

*Article:* Morphology control of hydroxyapatite as a potential reinforcement for orthopedic biomaterials: The hydrothermal process.

**Piotr Szterner\*, Agnieszka Antosik, Joanna Pagacz and Paulina Tymowicz-Grzyb**

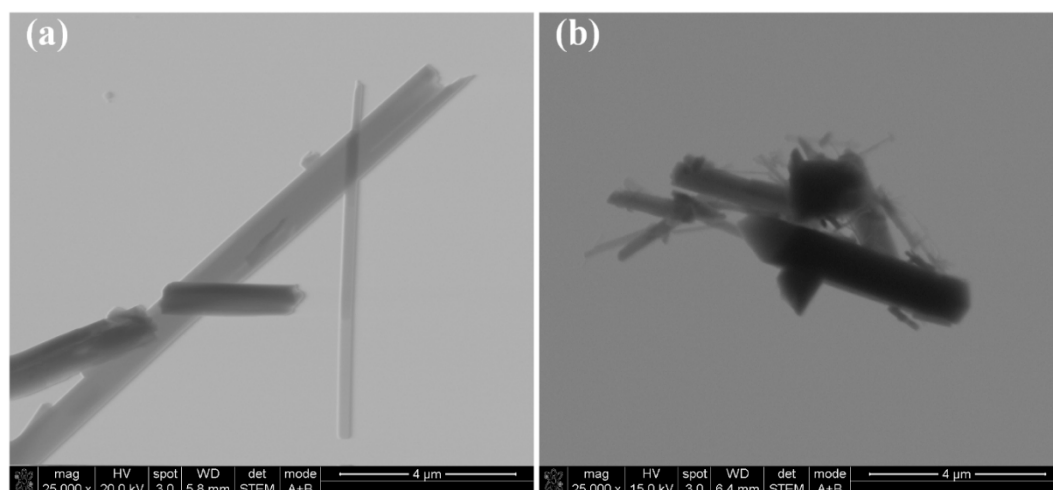

**Figure S1.** STEM images of products obtained in hydrothermal synthesis (200 °C, 20 bar, 5 h) for (a) whiskers  $\text{Ca}^{2+}$  ion concentration 0.05 mol/dm<sup>3</sup>, and (b) hexagonal rods  $\text{Ca}^{2+}$  ion concentration 0.2 mol/dm<sup>3</sup>.

The STEM images of whiskers and hexagonal rods obtained during 5 hours of synthesis are shown in Figure S1. It is possible to observe that whiskers and hexagonal rods are characterized by smooth surface and clear contours.

**Table S1.** IR bands assignments for hydroxyapatites under investigation (vw-very weak, w-weak, sh-shoulder) [52,53].

| Band assignment                                                                                 | Ca <sup>2+</sup> concentration (mol/dm <sup>3</sup> ) and reaction time |           |           |           |           |             |                |
|-------------------------------------------------------------------------------------------------|-------------------------------------------------------------------------|-----------|-----------|-----------|-----------|-------------|----------------|
|                                                                                                 | 5h                                                                      |           |           |           |           | 1h          |                |
|                                                                                                 | 0.025                                                                   | 0.05      | 0.1       | 0.15      | 0.2       | 0.05        | 0.2            |
| OH surface                                                                                      | 3571                                                                    | 3571      | 3571      | 3570      | 3570      | 3571        | 3571           |
| water                                                                                           | 3415                                                                    | 3408      | 3468/3402 | 3468/3400 | 3467/3408 | 3397        | 3467/3413      |
| CH <sub>3</sub> ,CH <sub>2</sub>                                                                | 2971/2933/2882w                                                         | 2972/2932 | 2971/2929 | 2971/2927 | 2970/2924 | 2970/2928   | 2970/2931/2881 |
| Overtones CO <sub>3</sub> <sup>2-</sup> and<br>v <sub>3</sub> /v <sub>1</sub> PO <sub>4</sub>   | 2002/1988                                                               | 2002/1989 | 2002/1989 | 2002/1989 | 2002/1988 | 2002/1990   | 2002/1988      |
| Water<br>O-H                                                                                    | 1631                                                                    | 1631      | 1630 w    | 1635vw    | 1630      | 1630        | 1630           |
| P=O str.                                                                                        | 1210/1143                                                               | 1210 sh   | ~1210 vw  | –         | –         | 1206/1143sh | 1143sh         |
| v3 asym. PO <sub>4</sub> <sup>3-</sup>                                                          | 1105/1090                                                               | 1109/1092 | 1093      | 1092      | 1093      | 1098        | 1093           |
| v3 asym. PO <sub>4</sub> <sup>3-</sup> ideal crystal                                            | 1031                                                                    | 1031      | 1046/1020 | 1047/1023 | 1048/1023 | 1031        | 1048/1026      |
| asym. str. P-O                                                                                  | 963                                                                     | 962       | 961       | 961       | 961       | 963         | 962            |
| CO <sub>3</sub> <sup>2-</sup>                                                                   | 872                                                                     | 872       | 876       | 878       | ~878sh    | 867*        | 876            |
| P <sub>2</sub> O <sub>7</sub> <sup>4-</sup>                                                     | 729w                                                                    | 729vw     | 733vw     | 726vw     | 726vw     | 730vw       | 731vw          |
| str. OH <sup>-</sup><br>labile PO <sub>4</sub> <sup>3-</sup>                                    | 634                                                                     | 635       | 633       | 633       | 633       | 634         | 633            |
| 603+562+473<br>v <sub>4</sub> str. PO <sub>4</sub> <sup>3-</sup>                                | 603                                                                     | 602       | 603       | 603       | 603       | 603         | 603            |
|                                                                                                 | 563                                                                     | 563       | 563       | 562       | 562       | 562         | 562            |
|                                                                                                 | 473                                                                     | 473       | 473       | 473       | 473       | 473         | 473            |
| H <sub>2</sub> PO <sub>4</sub> <sup>-</sup> ,<br>or P <sub>2</sub> O <sub>7</sub> <sup>4-</sup> | 427                                                                     | ~427vw    | ~427vw    | –         | ~427vw    | ~429vw      | 425            |

**Table S2.** Effect of the synthesis temperature and the pressure on the lattice parameters of the phases present in the synthesized powders (reaction conditions:  $\text{Ca}^{2+}$  0.05 mol/dm<sup>3</sup>, 200°C, 5 h, 250 rpm).

| temperatur<br>e (°C) | pressure<br>(bar) | phase<br>composition | COD          | system    | space group | crystal lattice parameters |          |          |                         |
|----------------------|-------------------|----------------------|--------------|-----------|-------------|----------------------------|----------|----------|-------------------------|
|                      |                   |                      |              |           |             | a<br>(Å)                   | b<br>(Å) | c<br>(Å) | V*<br>(Å <sup>3</sup> ) |
| 200                  | 20                | HAp                  | 9002214 [50] | hexagonal | P 63/m      | 9.43940                    | 9.43940  | 6.88610  | 531.36                  |
| 170                  | 10                | HAp                  | 9011092 [49] | hexagonal | P 63/m      | 9.42400                    | 9.42400  | 6.87900  | 529.09                  |
| 150                  | 6                 | HAp                  | 9011092 [49] | hexagonal | P 63/m      | 9.42400                    | 9.42400  | 6.87900  | 529.09                  |
| 130                  | 4                 | HAp                  | 9001233 [48] | hexagonal | P 63/m      | 9.41660                    | 9.41660  | 6.87450  | 527.91                  |
| 110                  | 2                 | HAp                  | 9001233 [48] | hexagonal | P 63/m      | 9.41660                    | 9.41660  | 6.87450  | 527.91                  |
|                      |                   | DCPA                 | 9007619 [51] | triclinic | P1          | 6.91                       | 6.627    | 6.99800  | 309.28                  |

\*cell volume.

**Table S3.** Effect of the stirring rate on the lattice parameters of the phases present in the synthesized powders (reaction conditions:  $\text{Ca}^{2+}$  0.05 mol/dm<sup>3</sup>, 200 °C, 5 h, 20 bar).

| Stirring rate<br>(rpm) | phase composition | COD          | crystal lattice<br>parameters |          |                         |
|------------------------|-------------------|--------------|-------------------------------|----------|-------------------------|
|                        |                   |              | a=b<br>(Å)                    | c<br>(Å) | V*<br>(Å <sup>3</sup> ) |
| 1000                   | HAp               | 9001233 [48] | 9.41660                       | 6.87450  | 527.91                  |
| 750                    | HAp               | 9001233 [48] | 9.41660                       | 6.87450  | 527.91                  |
| 250                    | HAp               | 9011092 [49] | 9.42400                       | 6.87900  | 529.09                  |
| 125                    | HAp               | 9011092 [49] | 9.42400                       | 6.87900  | 529.09                  |
| 62.5                   | HAp               | 9002214 [50] | 9.43940                       | 6.88610  | 531.36                  |
| 0                      | HAp               | 9002214 [50] | 9.43940                       | 6.88610  | 531.36                  |

\*cell volume.
